# Supplementary material
Source: HighWire-hosted journal article supplement (https://www.cfp.ca/highwire/filestream/30438/field_highwire_adjunct_files/1/PCC_Form_Women.pdf)
Supplement: PCC_Form_Women.pdf [file PCC_Form_Women.pdf]

**Please note:**

**Bold** = Grade A, or strong evidence (from the Canadian Task Force on Preventive Health Care)  
*Italics* = Grade B, or weak evidence (from the Canadian Task Force on Preventive Health Care)  
Plain text = Guidelines (from other Canadian sources)

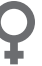

Name:

**Physical Examination**

**BP:**            *Pap:*            **HT:**            **WT:**            **BMI:**

| Age                 | ≤ 64 years                                                                                                                                                                                                                                                                                                                                                                                                                                                                                                                                                                                                                                                                        | ≥ 65 years                                                                                                                                                                                                                                                                                                                                                                                                                                                                                                                                                                                                                                                                                                                |
|---------------------|-----------------------------------------------------------------------------------------------------------------------------------------------------------------------------------------------------------------------------------------------------------------------------------------------------------------------------------------------------------------------------------------------------------------------------------------------------------------------------------------------------------------------------------------------------------------------------------------------------------------------------------------------------------------------------------|---------------------------------------------------------------------------------------------------------------------------------------------------------------------------------------------------------------------------------------------------------------------------------------------------------------------------------------------------------------------------------------------------------------------------------------------------------------------------------------------------------------------------------------------------------------------------------------------------------------------------------------------------------------------------------------------------------------------------|
| Labs/Investigations | <input type="checkbox"/> <i>Mammography (50-74 yrs, q2-3 yrs)</i><br><input type="checkbox"/> <b>Hemoccult multiphase q1-2 yrs</b> (≥50 yrs)<br>OR <input type="checkbox"/> <i>Sigmoidoscopy</i> OR <input type="checkbox"/> Colonoscopy<br><input type="checkbox"/> <b>Cervical Cytology q3 yrs</b> (if ever sexually active and 25-69 yrs)<br><input type="checkbox"/> <b>Gonorrhea/Chlamydia/Syphilis/HIV/HSV/HCV screen</b> (high risk)<br><input type="checkbox"/> Fasting Lipid Profile q1-5 yrs (≥50 yrs, postmenopausal or sooner if at risk)<br><input type="checkbox"/> <i>A1C or FPG if at risk</i><br><input type="checkbox"/> <i>Bone Mineral Density if at risk</i> | <input type="checkbox"/> <i>Mammography (50-74 yrs, q2-3 yrs)</i><br><input type="checkbox"/> <b>Hemoccult Multiphase q1-2 yrs</b> (up to 74 yrs)<br>OR <input type="checkbox"/> <i>Sigmoidoscopy</i> OR <input type="checkbox"/> Colonoscopy<br><input type="checkbox"/> <b>Cervical Cytology q3 yrs</b> (if ever sexually active and up to 69 yrs)<br><input type="checkbox"/> <b>Gonorrhea/Chlamydia/Syphilis/HIV/HSV/HCV screen</b> (high risk)<br><input type="checkbox"/> <i>Audioscope (or inquire/whispered voice test)</i><br><input type="checkbox"/> Fasting Lipid Profile q1-5 yrs (≤75 yrs)<br><input type="checkbox"/> <i>A1C or FPG if at risk</i><br><input type="checkbox"/> <i>Bone Mineral Density</i> |
| Immunizations       | <input type="checkbox"/> <b>Tetanus vaccine q10 yrs</b> <input type="checkbox"/> Meningococcal vaccine<br><input type="checkbox"/> <b>Influenza vaccine q1 yr</b> <input type="checkbox"/> Herpes zoster vaccine (≥60 yrs)<br><input type="checkbox"/> Acellular pertussis vaccine<br><input type="checkbox"/> Human papillomavirus vaccine (up to 45 yrs)<br><input type="checkbox"/> Measles/Mumps/Rubella vaccine<br><input type="checkbox"/> Varicella vaccine (2 doses)                                                                                                                                                                                                      | <input type="checkbox"/> <b>Tetanus vaccine q10 yrs</b><br><input type="checkbox"/> <b>Influenza vaccine q1 yr</b><br><input type="checkbox"/> Pneumococcal vaccine<br><input type="checkbox"/> Acellular pertussis vaccine<br><input type="checkbox"/> Herpes zoster vaccine<br><input type="checkbox"/> Varicella vaccine (2 doses)                                                                                                                                                                                                                                                                                                                                                                                     |

**Assessment and Plans**

**Date:**

**Signature:**

**References:** See explanation sheet for references and recommendations.

**Disclaimer:** This form is a guide to the adult periodic health examination. Last updated February 2015. The recommendations are for average-risk adults.

Endorsed by:

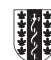

The College of Family Physicians of Canada

Le Collège des médecins de famille du Canada
